# Supplementary material for: X-Ray-Induced Changes to Passivation Layers of Lithium-Ion Battery Electrodes
Source: Hindawi journal article supplement (doi:10.1155/2018/1075902), 2018-11-01

# The HAXPES Advantage

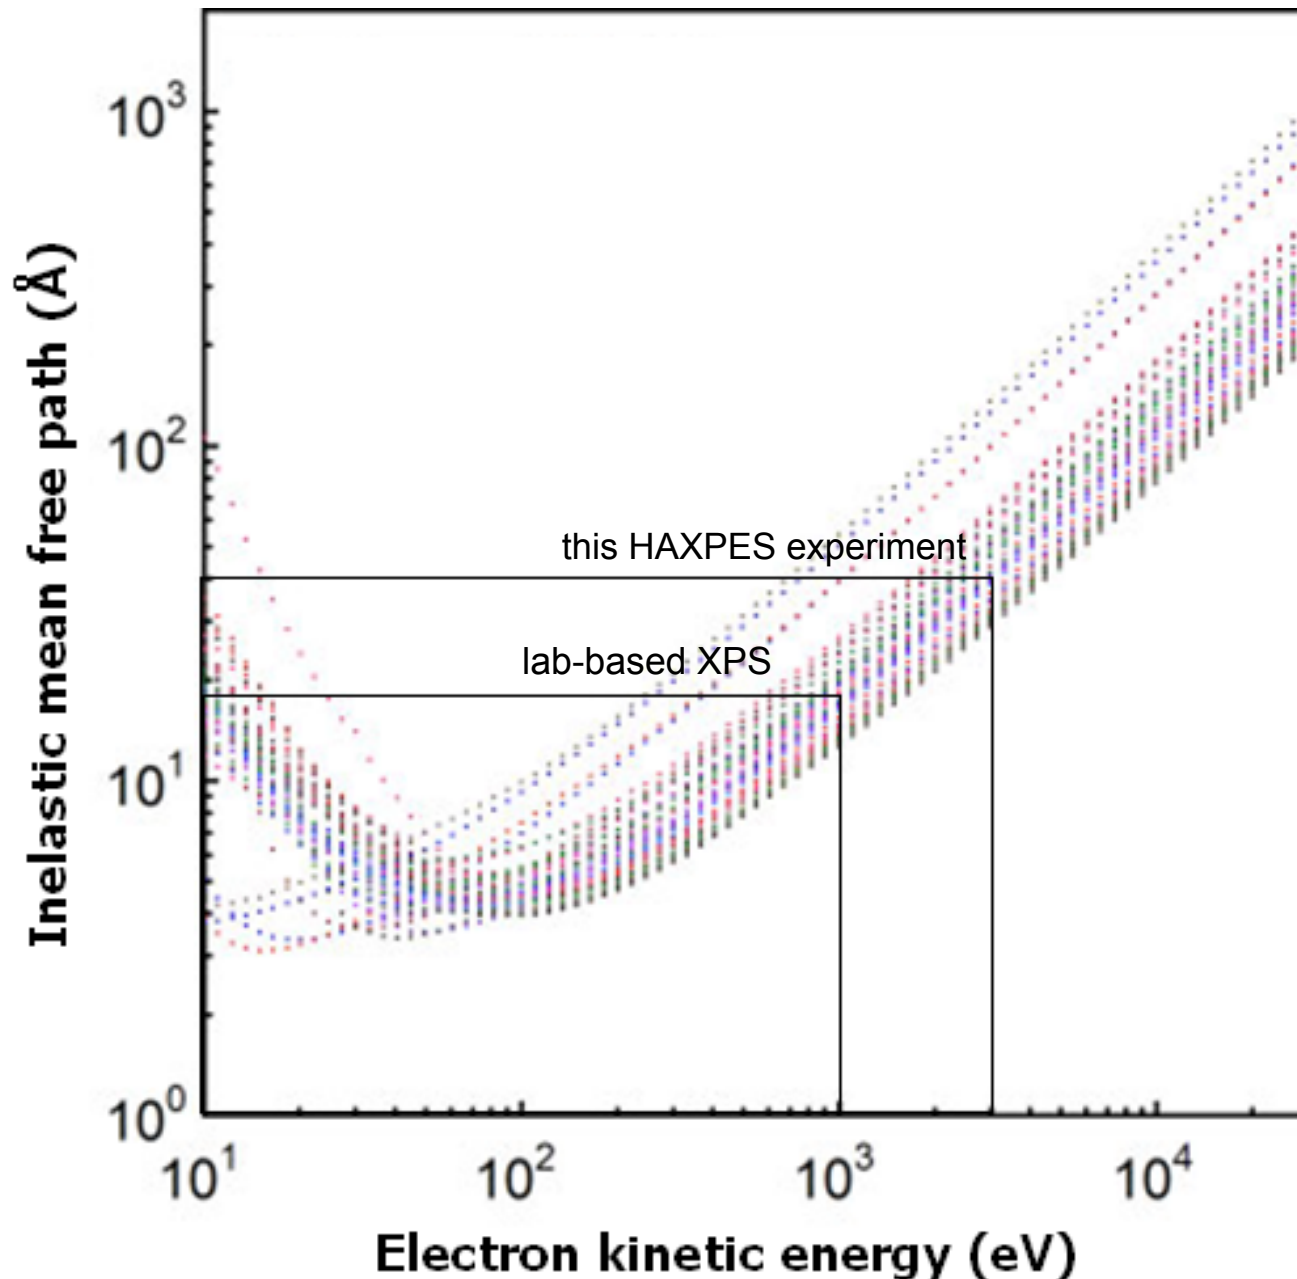

$$KE_{max} = h\nu - BE - \phi$$

IMFP vs.  
electron KE for  
41 elemental  
solids

| Cross sections from reference 42 (barns)                                                                                      |          |           |            |          |            |          |            |            |            |          |            |
|-------------------------------------------------------------------------------------------------------------------------------|----------|-----------|------------|----------|------------|----------|------------|------------|------------|----------|------------|
| photon energy                                                                                                                 | P 1s     | Si 1s     | F 1s       | O 1s     | C 1s       | Si 2s    | P 2p       | Si 2p      | Li 1s      |          |            |
| 4000                                                                                                                          | 24639    | 19410     | 3720       | 2323.9   | 706.57     | 1159.1   | 581.5      | 380.3      | 32.264     |          |            |
|                                                                                                                               |          |           |            |          |            |          |            |            |            |          |            |
| IMFP equation (Å) from fit to data in reference 40, independent variable is the electron kinetic energy                       |          |           |            |          |            |          |            |            |            |          |            |
| polynomial order                                                                                                              | 0        | 1         | 2          |          |            |          |            |            |            |          |            |
| leading factor                                                                                                                | 6.90213  | 0.0253556 | -3.64E-07  |          |            |          |            |            |            |          |            |
|                                                                                                                               |          |           |            |          |            |          |            |            |            |          |            |
| Transmission Function (relative luminosity) from fit to data in reference 41, independent variable is electron kinetic energy |          |           |            |          |            |          |            |            |            |          |            |
| polynomial order                                                                                                              | 0        | 1         | 2          | 3        | 4          | 5        | 6          | 7          | 8          | 9        | 10         |
| leading factor                                                                                                                | -0.40688 | 0.0181553 | -4.552E-05 | 5.88E-08 | -4.626E-11 | 2.36E-14 | -7.956E-18 | 1.7617E-21 | -2.462E-25 | 1.97E-29 | -6.858E-34 |

| Core | IMFP(Å)<br>@hv=1487e<br>V | IMFP(Å)<br>@hv=4000e<br>V |
|------|---------------------------|---------------------------|
| Li1s | 42                        | 101                       |
| Si2p | 41                        | 100                       |
| P2p  | 40                        | 99                        |
| C1s  | 37                        | 95                        |
| O1s  | 30                        | 89                        |
| F1s  | 26                        | 85                        |
| Si1s | N/A                       | 56                        |
| P1s  | N/A                       | 48                        |

| period | LixSi fit area | LixSi fit dA | LixSiOy fit area | LixSiOy fit dA | bkgd    | dbkgd | lambda (Å) | LixSi relative thickness (Å) | LixSiOy relative thickness (Å) |
|--------|----------------|--------------|------------------|----------------|---------|-------|------------|------------------------------|--------------------------------|
| 1      | 370140         | 15557        | 1207100          | 68295          | 1068270 | 5     | 59.9978972 | 0                            | 0                              |
| 2      | 392210         | 15878        | 1304900          | 58638          | 1043400 | 5     | 59.9978972 | -4.88814893                  | -6.08747825                    |
| 3      | 414630         | 17386        | 1360300          | 57252          | 1022020 | 5     | 59.9978972 | -9.465550273                 | -9.824291566                   |
| 4      | 411640         | 17024        | 1375800          | 53352          | 1000750 | 5     | 59.9978972 | -10.29315928                 | -11.76591103                   |
| 5      | 415220         | 16269        | 1395500          | 50362          | 976604  | 5     | 59.9978972 | -12.27807389                 | -14.08429844                   |
| 6      | 419270         | 17247        | 1394500          | 52380          | 994564  | 5     | 59.9978972 | -11.76709585                 | -12.94793535                   |
| 7      | 427320         | 17139        | 1402400          | 51134          | 1006800 | 5     | 59.9978972 | -12.17449538                 | -12.55322799                   |
| 8      | 420580         | 16390        | 1376100          | 50677          | 981265  | 5     | 59.9978972 | -12.76195109                 | -12.95869764                   |
| 9      | 435300         | 19452        | 1414000          | 58711          | 1012920 | 5     | 59.9978972 | -12.92099144                 | -12.68385831                   |
| 10     | 427590         | 19828        | 1360300          | 61475          | 991133  | 5     | 59.9978972 | -13.15337161                 | -11.66548345                   |

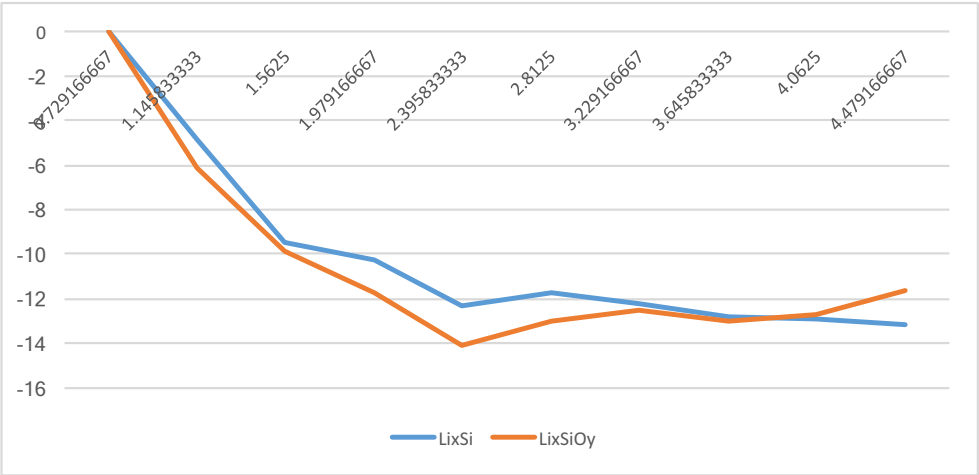

Supplement: f1 [file 1075902.f1.pdf]
